# Supplementary material
Source: publisher site journal article supplement (https://www.spandidos-publications.com/7484/downloadSupplementary)
Supplement: Supplementary file 1 [file downloadSupplementary]

Table SI. Binding affinity scores and interacting residues of filtered compounds docked to the  $\gamma$ -aminobutyric acid B receptor.

| PubChem identification | Binding energy (Kcal/mol) | Interacting residues           |
|------------------------|---------------------------|--------------------------------|
| Baclofen               | -7.9                      | Ser153, Ser130, Tyr250, Gln349 |
| 5281795                | -8.2                      | Tyr250, Glu251, Trp278, His176 |
| 10394                  | -7.7                      | Ser153, Ser130, Tyr250         |
| 6448                   | -7.6                      | Ser130, Ser153, Tyr250, Gly151 |
| 7393172                | -7.4                      | Ser130, Ser153, His170         |
| 699414                 | -7.3                      | Ser153                         |
| 582                    | -7.2                      | Ser153                         |
| 6057                   | -7.2                      | Ser153, Ser130, Tyr250, Phe249 |
| 9457                   | -7.2                      | Ser153, Gly151                 |
| 2556155                | -7.2                      | Trp64, Trp278, Glu251          |
| 31226                  | -7.2                      | Ser153, Ser130, Tyr250         |
| 450432                 | -7.1                      | Tyr250, Gly151, Ser153, Ser130 |
| 441457                 | -7.1                      | Ser153, Ser130, Tyr250         |
| 637542                 | -7.0                      | No hydrogen bond               |
| 6931754                | -6.9                      | Ser153, Gly151                 |
| 637541                 | -6.8                      | Ser130, Ser153                 |
| 6918907                | -6.7                      | No hydrogen bond               |
| 450502                 | -6.1                      | Tyr279, Gln348, Phe347, Gly346 |
